# Supplementary material for: Consumer complaints about food packaging
Source: Frontiers journal article supplement (doi:10.3389/fsufs.2023.1047451), 2023-08-02
Supplement: Table_1.DOCX [file Table_1.DOCX]

Consumer Complaints about Food Packaging

Supplementary Data

***Annex A – Considered websites (alphabetically) which contained complaints about dissatisfactory packaging***

| 1. [www.boredpanda.com](http://www.boredpanda.com) |
| --- |
| 1. [www.dailydoseoflol.com](http://www.dailydoseoflol.com) |
| 1. [www.demilked.com](http://www.demilked.com) |
| 1. [www.fishki.net](http://www.fishki.net) |
| 1. [www.gwp.co.uk](http://www.gwp.co.uk) |
| 1. [www.instagram.com](http://www.instagram.com) |
| 1. [www.interestingengineering.com](http://www.interestingengineering.com) |
| 1. [www.ipackdesign.com](http://www.ipackdesign.com) |
| 1. [­](http://www.boredpanda.com)[www.knowyourmeme.com](http://www.knowyourmeme.com) |
| 1. [www.packhelp.com](http://www.packhelp.com) |
| 1. [www.piqueen.com](http://www.pigqueen.com) |
| 1. [www.pleated-jeans.com](http://www.pleated-jeans.com) |
| 1. [www.reddit.com](http://www.reddit.com) |
| 1. [www.skaties.lv](http://www.skaties.lv) |
| 1. [www.sudzibas.lv](http://www.sudzibas.lv) |
| 1. [www.twitter.com](http://www.twitter.com) |
| 1. [www.unifiedmanufacturing.com](http://www.unifiedmanufacturing.com) |
| 1. [www.utopia.de](http://www.utopia.de) |
| 1. [www.videvestis.lv](http://www.videvestis.lv) |
| 1. [www.voolas.com](http://www.voolas.com) |
| 1. [www.watson.de](http://www.watson.de) |

***Annex B - Products addressed in complaints, assigned to food categories based on* 3**

| **Food category** | **Products and frequency in sample** |
| --- | --- |
| **0. Compound foodstuffs**  (Added category describing compound meals at different convenience levels) | **Sum = 21**   - Moussaka (1) - Pizza (9) - Rolls (2) - Wraps (4) - Pasta (1) - Cheese with breadsticks (1) - Sandwich (2) - Hot Dog (1) |
| **1. Dairy products and analogues**  *(1.1 Unflavoured pasteurised and unflavoured sterilised (including UHT) milk, 1.2 Unflavoured fermented milk products, including natural unflavoured buttermilk (excluding sterilised buttermilk) non-heat-treated after fermentation, 1.3 unflavoured fermented milk products, heat-treated after fermentation, 1.4 flavoured fermented milk products including heat-treated products, 1.5 dehydrated milk as defined by Directive 2001/114/EC, 1.6 cream and cream powder, 1.7 cheese and cheese products, 1.8 Dairy analogues, including beverage whiteners, 1.9 edible caseinates)* | **Sum = 16**   - Yogurt and yogurt drinks (4) - Cheese and cheese products (9) - Curd desserts (2) - Beverage whitener (1) |
| **2. Fats and oils and fat and oil emulsions**  *(2.1 Fats and oils essentially free from water, 2.2 Fat and oil emulsions mainly of water-in-oil type, 2.3 Vegetable oil pan spray)* | **Sum = 3**   - Vegetable oil (1) - Butter (2) |
| **3. Edible Ices** | **Sum = 3**   - Edible Ices (3) |
| **4. Fruits & Vegetables**  (4.1 Unprocessed fruits and vegetables, 4.2 Processed fruits and vegetables) | **Sum = 59**   - Fennel (1) - Strawberry (4) - Apple (4) - Banana (5) - Citrus fruits (9) - Potato (5) - Coconut (4) - Melon (3) - Carrot (2) - Pear (1) - Tomato (2) - Garlic (3) - Onion (2) - Mixed fruits and vegetables (2) - Mango (1) - Beet (1) - Salad (1) - Cauliflower and broccoli (3) - Aubergine (1) - Plantain (1) - Apricot (1) - Avocado (1) - Cucumber (1) - Corn (1) |
| **5. Confectionery**  (5.1 Cocoa and chocolate products as covered by Directive 2000/36/EC, 5.2 Other confectionery including breath freshening micro-sweets, 5.3 Chewing gum, 5.4 Decorations, coatings and fillings, except fruit-based fillings covered by category 4.2.4) | **Sum = 44**   - Dragon beard candy (1) - Jelly babies and beans (6) - Chocolate and pralines (12) - Chocolate coated nuts (1) - Lokum (2) - Chocolate Lentils (5) - Hard candy (3) - Chewing gum (3) - Soft candy (2) - Nougat (1) - Mint thins (3) - Cocoa powder (1) - Spread (3) - Pastille (1) |
| **6. Cereal and Cereal Products**  (6.1 Whole, broken, or flaked grain, 6.2 Flours and other milled products and starches, 6.3 Breakfast cereals, 6.4 Pasta, 6.5 Noodles, 6.6 Batters, 6.7 Pre-cooked or processed cereals) | **Sum = 13**   - Breakfast cereals (8) - Pasta (3) - Rice (2) |
| **7. Bakery wares**  (7.1 Bread and rolls, 7.2 Fine bakery wares) | **Sum = 26**   - Cookie (10) - Cereal bar (2) - Pastry (1) - Bread (4) - Cake and sweet rolls (8) - Donut (1) |
| **8. Meat**  *(8.1 Fresh meat, excluding meat preparations as defined by Regulation (EC) No 853/2004, 8.2 Meat preparations as defined by Regulation (EC) No 853/2004, 8.3 Meat Products)* | **Sum = 12**   - Fresh meat (3) - Meat roast (2) - Sausage (4) - Pate (1) - Jerky (1) - Cold cuts (1) |
| **9. Fish and fishery products**  *(9.1 Unprocessed fish and fisheries products,9.2 Processed fish and fishery products including molluscs and crustaceans, 9.3 Fish roe)* | **Sum = 5**   - Shrimp (2) - Salmon (3) |
| **10. Eggs and egg products**  *(10.1 Unprocessed eggs, 10.2 Processed eggs and egg products)* | **Sum = 5**   - Cooked eggs (4) - Raw eggs (1) |
| **11. Sugars, syrups, honey and table-top sweeteners**  *(11.1 Sugars and syrups as defined by Directive 2001/111/EC, 11.2 Other sugars and syrups, 11.3 Honey as defined in Directive 2001/110/EC, 11.4 Table-top sweeteners)* | **Sum = 1**   - Sugar (1) |
| **12. Salts, spices, soups, sauces, salads and protein products**  *(12.1 Salt and salt substitutes, 12.2 Herbs, spices, seasonings, 12.3 Vinegars and diluted acetic acid (diluted with water to 4-30 % by volume), 12.4 Mustard, 12.5 Soups and broths, 12.6 Sauces, 12.7 Salads and savoury based sandwich spreads, 12.8 Yeast and yeast products, 12.9 Protein products, excluding products covered in category 1.8)* | **Sum = 10**   - Soup (2) - Herbs and Spices (4) - Salad (1) - Spread (2) - Mustard (1) |
| **13. Foods intended for particular nutritional uses as defined by Directive 2009/39/EC**  *(13.1 Foods for infants and young children, 13.2 Dietary foods for special medical purposes defined in Directive 1999/21/EC (excluding products from food category 13.1.5), 13.3 Dietary foods for weight control diets intended to replace total daily food intake or an individual meal (the whole or part of the total daily diet), 13.4 Foods suitable for people intolerant to gluten as defined by Commission Regulation (EC) No 41/2009)* | **Sum = 2**   - Cookie (1) - Shake (1) |
| **14. Beverages**  *(14.1 Non-alcoholic beverages, 14.2 Alcoholic beverages, including alcohol-free and low-alcohol counterparts)* | **Sum = 20**   - Tea (4) - Juice (6) - Wine (1) - Soft drink (3) - Coffee (1) - Water (1) - Powdered drinks (3) - Beer (1) |
| **15. Ready-to-eat savouries and snacks**  *(15.1 Potato-, cereal-, flour-, or starch-based snacks, 15.2 Processed nuts)* | **Sum = 10**   - Chips (5) - Popcorn (1) - Nuts (3) - Cracker (1) |
